# Supplementary material
Source: PubMed Central journal article supplement (PMC4998116)
Supplement: CMM-15-674_SD1.pdf [file CMM-15-674_SD1.pdf]

## SUPPLEMENTARY MATERIAL

Salivary Gland Dysplasia in *Fgf10* Heterozygous Mice: A New Mouse Model of XerostomiaA.J. May<sup>1</sup>, L. Chatzeli<sup>1</sup>, G.B. Proctor<sup>2</sup> and A.S. Tucker<sup>1</sup><sup>1</sup>Department of Craniofacial Development and Stem Cell Biology, <sup>2</sup>Department of Mucosal Biology and Salivary Division, Dental Institute, King's College London, Floor 27 Guy's Tower, London Bridge, SE1 9RT London, UK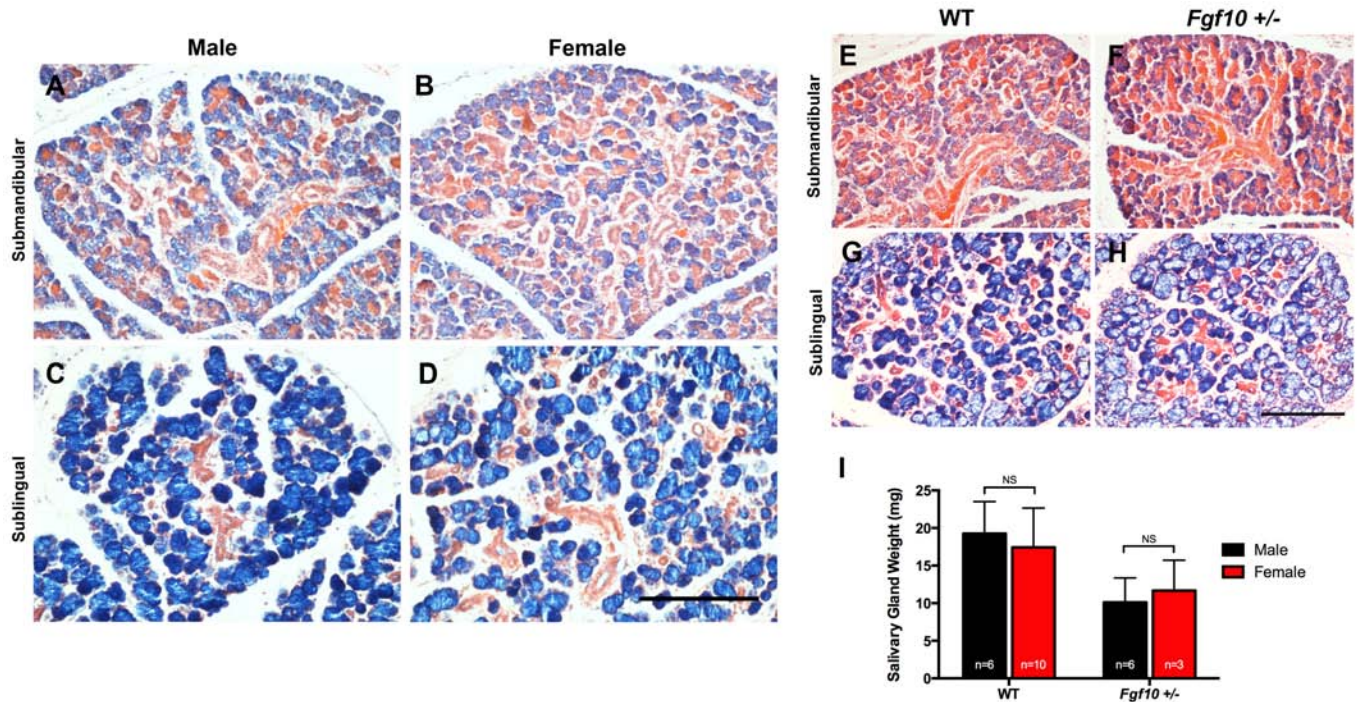

**Supplementary Fig. (S1).** Comparison of male and female SMG and SLGs aged P14. No obvious morphological differences were noted in either SMG (A, B) or SLG glands (C, D) between both sexes. Scale bar = 200 $\mu$ M. (E-H) P14 male WT and *Fgf10*<sup>+/-</sup> glands show no distinct morphological differences, scale bar=200 $\mu$ M. (I) No significant difference was seen between male and female salivary gland (SMG + SLG) weight in both WT and heterozygous animals at P14.

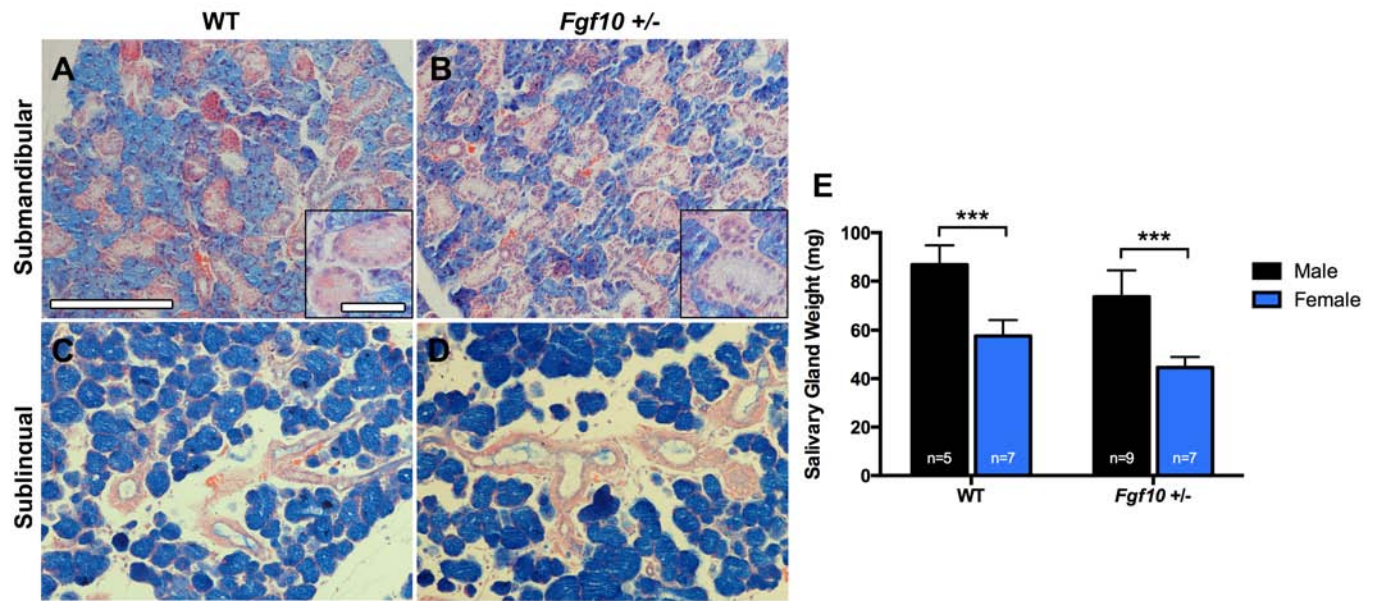

**Supplementary Fig. (S2). Male and female adult salivary glands.** (A-D) Female salivary glands. No morphological differences were seen in female WT and *Fgf10 +/-* SMGs (A-B) and SLGs (C-D). GCTs are smaller in female adult glands (inset images A-B) than those seen in male glands (Fig. 3 in text). A-B scale bar=200 $\mu$ m, inset scale bar=50 $\mu$ m. (E) A significant difference is seen between male and female salivary gland weight in WT and *Fgf10 +/-* groups.
